# Supplementary material for: Phthalic Acid Chemical Probes Synthesized for Protein-Protein Interaction Analysis
Source: MDPI journal article supplement (doi:10.3390/ijms140712914), 2013-06-24
Supplement: s1 [file s1]

## Sheet: mix1Rat
Hit	Member	Accession	Score	Mass	H/L	SD(geo)	#	Description
52		LEG1_RAT	46	15484	39.92	3.926	2	Galectin-1 OS=Rattus norvegicus GN=Lgals1 PE=1 SV=2
74		DYH12_RAT	27	366709	27.55	2.494	2	Dynein heavy chain 12, axonemal OS=Rattus norvegicus GN=Dnah12 PE=2 SV=2
13		ATPA_RAT	156	60826	17.9	1.918	3	ATP synthase subunit alpha, mitochondrial OS=Rattus norvegicus GN=Atp5a1 PE=1 SV=2
29		RSSA_RAT	80	33272	17.65	1.098	2	40S ribosomal protein SA OS=Rattus norvegicus GN=Rpsa PE=1 SV=3
62		RS10_RAT	36	19321	14.2	2.983	2	40S ribosomal protein S10 OS=Rattus norvegicus GN=Rps10 PE=2 SV=1
24		HS90B_RAT	86	85981	13.28	1.537	3	Heat shock protein HSP 90-beta OS=Rattus norvegicus GN=Hsp90ab1 PE=1 SV=4
14		TBB5_RAT	130	50584	12.79	1.233	2	Tubulin beta-5 chain OS=Rattus norvegicus GN=Tubb5 PE=1 SV=1
28		G3P_RAT	81	36929	11.99	1.653	3	Glyceraldehyde-3-phosphate dehydrogenase OS=Rattus norvegicus GN=Gapdh PE=1 SV=3
73		S10A6_RAT	29	10407	11.41	1.186	2	Protein S100-A6 OS=Rattus norvegicus GN=S100a6 PE=1 SV=3
66		PGK1_RAT	33	46230	10.78	1.508	2	Phosphoglycerate kinase 1 OS=Rattus norvegicus GN=Pgk1 PE=1 SV=2
7		ACTB_RAT	228	42667	10.51	1.246	8	Actin, cytoplasmic 1 OS=Rattus norvegicus GN=Actb PE=1 SV=1
10		EF1A1_RAT	166	51937	10.02	2.168	13	Elongation factor 1-alpha 1 OS=Rattus norvegicus GN=Eef1a1 PE=1 SV=1
77		SEPT7_RAT	24	52299	9.823	2.296	2	Septin-7 OS=Rattus norvegicus GN=Sept7 PE=1 SV=1
17		VINC_RAT	116	119527	9.82	1.018	2	Vinculin OS=Rattus norvegicus GN=Vcl PE=1 SV=1
18		PROF1_RAT	104	15410	7.462	1.433	3	Profilin-1 OS=Rattus norvegicus GN=Pfn1 PE=1 SV=2
67		CALR_RAT	32	49486	7.392	2.303	2	Calreticulin OS=Rattus norvegicus GN=Calr PE=1 SV=1
4		ANXA1_RAT	389	40147	7.34	1.151	7	Annexin A1 OS=Rattus norvegicus GN=Anxa1 PE=1 SV=2
6		PDIA6_RAT	246	49607	7.179	1.47	5	Protein disulfide-isomerase A6 OS=Rattus norvegicus GN=Pdia6 PE=1 SV=2
75		RS23_RAT	27	16613	6.709	1.037	2	40S ribosomal protein S23 OS=Rattus norvegicus GN=Rps23 PE=2 SV=3
21		NONO_RAT	95	55763	6.66	1.204	2	Non-POU domain-containing octamer-binding protein OS=Rattus norvegicus GN=Nono PE=2 SV=3
50		EF1G_RAT	47	51435	6.255	3.337	2	Elongation factor 1-gamma OS=Rattus norvegicus GN=Eef1g PE=1 SV=3
2		TBA1B_RAT	495	51425	6.067	4.098	11	Tubulin alpha-1B chain OS=Rattus norvegicus GN=Tuba1b PE=1 SV=1
1		SERPH_RAT	565	47726	5.637	2	12	Serpin H1 OS=Rattus norvegicus GN=Serpinh1 PE=1 SV=1
5		ENOA_RAT	369	48600	5.431	2.231	13	Alpha-enolase OS=Rattus norvegicus GN=Eno1 PE=1 SV=4
72		FPPS_RAT	29	41953	5.415	5.001	2	Farnesyl pyrophosphate synthase OS=Rattus norvegicus GN=Fdps PE=2 SV=2
20		MDHM_RAT	97	36926	5.25	5.948	3	Malate dehydrogenase, mitochondrial OS=Rattus norvegicus GN=Mdh2 PE=1 SV=2
69		RPN2_RAT	32	70113	5.242	2.239	2	Dolichyl-diphosphooligosaccharide--protein glycosyltransferase subunit 2 OS=Rattus norvegicus GN=Rpn2 PE=2 SV=2
22		LDHA_RAT	90	37615	5.119	2.772	3	L-lactate dehydrogenase A chain OS=Rattus norvegicus GN=Ldha PE=1 SV=1
68		RL4_RAT	32	49402	5.084	1.639	2	60S ribosomal protein L4 OS=Rattus norvegicus GN=Rpl4 PE=1 SV=3
15	2	HSP7C_RAT	106	72790	5.059	1.811	4	Heat shock cognate 71 kDa protein OS=Rattus norvegicus GN=Hspa8 PE=1 SV=1
3		PDIA1_RAT	482	58957	4.98	1.349	5	Protein disulfide-isomerase OS=Rattus norvegicus GN=P4hb PE=1 SV=2
19		KPYM_RAT	102	59457	4.936	3.534	4	Pyruvate kinase isozymes M1/M2 OS=Rattus norvegicus GN=Pkm2 PE=1 SV=3
15	1	GRP78_RAT	129	74432	4.85	1.766	5	78 kDa glucose-regulated protein OS=Rattus norvegicus GN=Hspa5 PE=1 SV=1
9		ENPL_RAT	178	95376	4.741	1.652	4	Endoplasmin OS=Rattus norvegicus GN=Hsp90b1 PE=1 SV=2
39		ARP3_RAT	58	48528	4.327	12.94	2	Actin-related protein 3 OS=Rattus norvegicus GN=Actr3 PE=1 SV=1
45		TKT_RAT	53	69797	4.136	4.093	2	Transketolase OS=Rattus norvegicus GN=Tkt PE=1 SV=1
63		ADT1_RAT	35	33970	3.992	5.188	2	ADP/ATP translocase 1 OS=Rattus norvegicus GN=Slc25a4 PE=1 SV=3
78		CDHR1_RAT	21	95040	3.989	2.44	2	Cadherin-related family member 1 OS=Rattus norvegicus GN=Cdhr1 PE=2 SV=1
16		PSD13_RAT	127	43818	3.585	5.934	5	26S proteasome non-ATPase regulatory subunit 13 OS=Rattus norvegicus GN=Psmd13 PE=1 SV=1
44		CH60_RAT	54	62822	3.503	3.01	2	60 kDa heat shock protein, mitochondrial OS=Rattus norvegicus GN=Hspd1 PE=1 SV=1
40		TCPE_RAT	58	61245	3.492	1.022	2	T-complex protein 1 subunit epsilon OS=Rattus norvegicus GN=Cct5 PE=1 SV=1
61		ANXA2_RAT	36	40002	3.372	4.087	2	Annexin A2 OS=Rattus norvegicus GN=Anxa2 PE=1 SV=2
8		ATPB_RAT	215	57056	3.223	7.621	6	ATP synthase subunit beta, mitochondrial OS=Rattus norvegicus GN=Atp5b PE=1 SV=2
23		GDIB_RAT	89	52213	3.153	2.972	3	Rab GDP dissociation inhibitor beta OS=Rattus norvegicus GN=Gdi2 PE=1 SV=2
47		DHSA_RAT	51	73511	2.657	3.805	2	Succinate dehydrogenase [ubiquinone] flavoprotein subunit, mitochondrial OS=Rattus norvegicus GN=Sdha PE=1 SV=1
58		IMB1_RAT	39	99742	2.558	5.175	2	Importin subunit beta-1 OS=Rattus norvegicus GN=Kpnb1 PE=1 SV=1
41		RL6_RAT	57	35001	2.542	1.916	2	60S ribosomal protein L6 OS=Rattus norvegicus GN=Rpl6 PE=1 SV=5
71		RL27_RAT	30	16525	2.459	3.297	2	60S ribosomal protein L27 OS=Rattus norvegicus GN=Rpl27 PE=2 SV=2
56		TCPB_RAT	40	58988	2.451	1.481	2	T-complex protein 1 subunit beta OS=Rattus norvegicus GN=Cct2 PE=1 SV=3
65		ANXA3_RAT	34	37406	2.003	1.089	2	Annexin A3 OS=Rattus norvegicus GN=Anxa3 PE=1 SV=4
55		RS4X_RAT	40	30677	1.961	5	2	40S ribosomal protein S4, X isoform OS=Rattus norvegicus GN=Rps4x PE=2 SV=2
12		PTBP1_RAT	158	60606	1.508	13.75	4	Polypyrimidine tract-binding protein 1 OS=Rattus norvegicus GN=Ptbp1 PE=1 SV=1
33		MYH9_RAT	71	234161	1.445	1.696	3	Myosin-9 OS=Rattus norvegicus GN=Myh9 PE=1 SV=3
26		ANXA5_RAT	83	36453	1.352	4.347	2	Annexin A5 OS=Rattus norvegicus GN=Anxa5 PE=1 SV=3
25		HNRPK_RAT	83	51940	0.9539	13.56	2	Heterogeneous nuclear ribonucleoprotein K OS=Rattus norvegicus GN=Hnrnpk PE=1 SV=1
11		PPIA_RAT	163	18544				Peptidyl-prolyl cis-trans isomerase A OS=Rattus norvegicus GN=Ppia PE=1 SV=2
27		PARK7_RAT	81	20674				Protein DJ-1 OS=Rattus norvegicus GN=Park7 PE=1 SV=1
30		ACLY_RAT	77	123859				ATP-citrate synthase OS=Rattus norvegicus GN=Acly PE=1 SV=1
31		CATB_RAT	77	38822				Cathepsin B OS=Rattus norvegicus GN=Ctsb PE=1 SV=2
32		G6PI_RAT	76	64275				Glucose-6-phosphate isomerase OS=Rattus norvegicus GN=Gpi PE=1 SV=1
34		TERA_RAT	68	91495				Transitional endoplasmic reticulum ATPase OS=Rattus norvegicus GN=Vcp PE=1 SV=3
35		RLA0_RAT	66	34977				60S acidic ribosomal protein P0 OS=Rattus norvegicus GN=Rplp0 PE=1 SV=2
36		ALDH2_RAT	65	57968				Aldehyde dehydrogenase, mitochondrial OS=Rattus norvegicus GN=Aldh2 PE=1 SV=1
37		TCPG_RAT	65	62310				T-complex protein 1 subunit gamma OS=Rattus norvegicus GN=Cct3 PE=1 SV=1
38		EF2_RAT	62	98261				Elongation factor 2 OS=Rattus norvegicus GN=Eef2 PE=1 SV=4
42		MBB1A_RAT	56	155920				Myb-binding protein 1A OS=Rattus norvegicus GN=Mybbp1a PE=2 SV=2
43		CAND1_RAT	55	140515				Cullin-associated NEDD8-dissociated protein 1 OS=Rattus norvegicus GN=Cand1 PE=1 SV=1
46		UBA1_RAT	51	120417				Ubiquitin-like modifier-activating enzyme 1 OS=Rattus norvegicus GN=Uba1 PE=1 SV=1
48		CLIC1_RAT	50	27857				Chloride intracellular channel protein 1 OS=Rattus norvegicus GN=Clic1 PE=1 SV=1
49		RS2_RAT	47	32271				40S ribosomal protein S2 OS=Rattus norvegicus GN=Rps2 PE=1 SV=1
51		AT5F1_RAT	46	29672				ATP synthase subunit b, mitochondrial OS=Rattus norvegicus GN=Atp5f1 PE=1 SV=1
53		CAP1_RAT	46	53187				Adenylyl cyclase-associated protein 1 OS=Rattus norvegicus GN=Cap1 PE=1 SV=3
54		RL7A_RAT	43	31401				60S ribosomal protein L7a OS=Rattus norvegicus GN=Rpl7a PE=1 SV=2
57		RL18_RAT	39	22344				60S ribosomal protein L18 OS=Rattus norvegicus GN=Rpl18 PE=2 SV=2
59		RLA2_RAT	38	12005				60S acidic ribosomal protein P2 OS=Rattus norvegicus GN=Rplp2 PE=1 SV=2
60		THIC_RAT	38	42219				Acetyl-CoA acetyltransferase, cytosolic OS=Rattus norvegicus GN=Acat2 PE=1 SV=1
64		PRDX1_RAT	35	22936				Peroxiredoxin-1 OS=Rattus norvegicus GN=Prdx1 PE=1 SV=1
70		VIME_RAT	31	54463				Vimentin OS=Rattus norvegicus GN=Vim PE=1 SV=2
76		PDIA3_RAT	25	58655				Protein disulfide-isomerase A3 OS=Rattus norvegicus GN=Pdia3 PE=1 SV=2

## Sheet: mix2Rat
Hit	Member	Accession	Score	Mass	H/L	SD(geo)	#	Description
68		TPIS_RAT	35	28027	27.24	1.761	2	Triosephosphate isomerase OS=Rattus norvegicus GN=Tpi1 PE=1 SV=2
66		IF4A2_RAT	37	47310	14.67	1.831	2	Eukaryotic initiation factor 4A-II OS=Rattus norvegicus GN=Eif4a2 PE=1 SV=1
22		ACLY_RAT	108	123859	13.89	1.546	2	ATP-citrate synthase OS=Rattus norvegicus GN=Acly PE=1 SV=1
64		LEG3_RAT	39	27499	11.99	1.694	2	Galectin-3 OS=Rattus norvegicus GN=Lgals3 PE=1 SV=4
72		RS10_RAT	34	19321	11.29	4.844	2	40S ribosomal protein S10 OS=Rattus norvegicus GN=Rps10 PE=2 SV=1
76		LEG1_RAT	31	15484	9.207	1.381	2	Galectin-1 OS=Rattus norvegicus GN=Lgals1 PE=1 SV=2
51		TKT_RAT	63	69797	8.691	2.124	4	Transketolase OS=Rattus norvegicus GN=Tkt PE=1 SV=1
78		APT_RAT	30	20086	8.588	7.354	2	Adenine phosphoribosyltransferase OS=Rattus norvegicus GN=Aprt PE=1 SV=1
14		KPYM_RAT	149	59457	8.503	2.37	6	Pyruvate kinase isozymes M1/M2 OS=Rattus norvegicus GN=Pkm2 PE=1 SV=3
87		EF1G_RAT	26	51435	7.694	1.208	2	Elongation factor 1-gamma OS=Rattus norvegicus GN=Eef1g PE=1 SV=3
63		PGK1_RAT	39	46230	6.937	1.114	2	Phosphoglycerate kinase 1 OS=Rattus norvegicus GN=Pgk1 PE=1 SV=2
45		PSD13_RAT	68	43818	6.874	3.019	2	26S proteasome non-ATPase regulatory subunit 13 OS=Rattus norvegicus GN=Psmd13 PE=1 SV=1
32		FAS_RAT	83	278416	6.16	1.811	2	Fatty acid synthase OS=Rattus norvegicus GN=Fasn PE=1 SV=3
21		MDHM_RAT	116	36926	5.916	2.665	4	Malate dehydrogenase, mitochondrial OS=Rattus norvegicus GN=Mdh2 PE=1 SV=2
57		GSTM2_RAT	50	26501	5.814	1.02	2	Glutathione S-transferase Mu 2 OS=Rattus norvegicus GN=Gstm2 PE=1 SV=2
23		G3P_RAT	108	36929	5.808	1.655	5	Glyceraldehyde-3-phosphate dehydrogenase OS=Rattus norvegicus GN=Gapdh PE=1 SV=3
71		CH60_RAT	34	62822	5.444	1.85	2	60 kDa heat shock protein, mitochondrial OS=Rattus norvegicus GN=Hspd1 PE=1 SV=1
12		VINC_RAT	174	119527	4.983	1.633	4	Vinculin OS=Rattus norvegicus GN=Vcl PE=1 SV=1
48		ARP3_RAT	65	48528	4.88	1.203	2	Actin-related protein 3 OS=Rattus norvegicus GN=Actr3 PE=1 SV=1
10		ACTB_RAT	254	42667	4.879	1.434	9	Actin, cytoplasmic 1 OS=Rattus norvegicus GN=Actb PE=1 SV=1
18		TBB5_RAT	131	50584	4.25	1.353	3	Tubulin beta-5 chain OS=Rattus norvegicus GN=Tubb5 PE=1 SV=1
1	2	TBA1A_RAT	200	51409	4.244	1.999	7	Tubulin alpha-1A chain OS=Rattus norvegicus GN=Tuba1a PE=1 SV=1
13		EF1A1_RAT	167	51937	4.112	1.37	10	Elongation factor 1-alpha 1 OS=Rattus norvegicus GN=Eef1a1 PE=1 SV=1
16		GDIB_RAT	133	52213	4.092	4.536	3	Rab GDP dissociation inhibitor beta OS=Rattus norvegicus GN=Gdi2 PE=1 SV=2
26		PROF1_RAT	105	15410	4.006	1.46	2	Profilin-1 OS=Rattus norvegicus GN=Pfn1 PE=1 SV=2
79		THIC_RAT	30	42219	3.967	1.745	2	Acetyl-CoA acetyltransferase, cytosolic OS=Rattus norvegicus GN=Acat2 PE=1 SV=1
40		DHSA_RAT	73	73511	3.661	5.735	2	Succinate dehydrogenase [ubiquinone] flavoprotein subunit, mitochondrial OS=Rattus norvegicus GN=Sdha PE=1 SV=1
8		PDIA6_RAT	265	49607	3.655	1.222	5	Protein disulfide-isomerase A6 OS=Rattus norvegicus GN=Pdia6 PE=1 SV=2
3		SERPH_RAT	555	47726	3.649	1.271	10	Serpin H1 OS=Rattus norvegicus GN=Serpinh1 PE=1 SV=1
5		ANXA1_RAT	444	40147	3.588	1.596	8	Annexin A1 OS=Rattus norvegicus GN=Anxa1 PE=1 SV=2
39		ENPL_RAT	74	95376	3.575	1.129	3	Endoplasmin OS=Rattus norvegicus GN=Hsp90b1 PE=1 SV=2
53		HSP7C_RAT	62	72790	3.495	1.428	2	Heat shock cognate 71 kDa protein OS=Rattus norvegicus GN=Hspa8 PE=1 SV=1
1	1	TBA1B_RAT	668	51425	3.49	2.209	10	Tubulin alpha-1B chain OS=Rattus norvegicus GN=Tuba1b PE=1 SV=1
6		LDHA_RAT	306	37615	3.341	1.559	3	L-lactate dehydrogenase A chain OS=Rattus norvegicus GN=Ldha PE=1 SV=1
35		MBB1A_RAT	80	156331	2.988	1.347	2	Myb-binding protein 1A OS=Rattus norvegicus GN=Mybbp1a PE=2 SV=2
27		MIF_RAT	102	12739	2.979	1.254	2	Macrophage migration inhibitory factor OS=Rattus norvegicus GN=Mif PE=1 SV=4
24		HS90B_RAT	107	85981	2.878	1.466	3	Heat shock protein HSP 90-beta OS=Rattus norvegicus GN=Hsp90ab1 PE=1 SV=4
37		GRP78_RAT	76	74432	2.869	1.203	4	78 kDa glucose-regulated protein OS=Rattus norvegicus GN=Hspa5 PE=1 SV=1
4		ENOA_RAT	503	48600	2.863	2.418	17	Alpha-enolase OS=Rattus norvegicus GN=Eno1 PE=1 SV=4
67		RS16_RAT	37	17064	2.736	1.163	2	40S ribosomal protein S16 OS=Rattus norvegicus GN=Rps16 PE=1 SV=2
58		OST48_RAT	48	49706	2.624	2.312	2	Dolichyl-diphosphooligosaccharide--protein glycosyltransferase 48 kDa subunit OS=Rattus norvegicus GN=Ddost PE=2 SV=1
86		CDHR1_RAT	26	95040	2.569	1.613	2	Cadherin-related family member 1 OS=Rattus norvegicus GN=Cdhr1 PE=2 SV=1
69		ANXA3_RAT	35	37406	2.533	1.249	2	Annexin A3 OS=Rattus norvegicus GN=Anxa3 PE=1 SV=4
41		HYOU1_RAT	72	113921	2.461	1.986	3	Hypoxia up-regulated protein 1 OS=Rattus norvegicus GN=Hyou1 PE=1 SV=1
60		IMB1_RAT	42	99742	2.303	5.122	2	Importin subunit beta-1 OS=Rattus norvegicus GN=Kpnb1 PE=1 SV=1
42		EF2_RAT	72	98261	2.268	3.495	2	Elongation factor 2 OS=Rattus norvegicus GN=Eef2 PE=1 SV=4
89		OLA1_RAT	25	46208	2.217	2.427	2	Obg-like ATPase 1 OS=Rattus norvegicus GN=Ola1 PE=2 SV=1
75		VIME_RAT	31	54463	2.192	1.604	2	Vimentin OS=Rattus norvegicus GN=Vim PE=1 SV=2
28		ACTN1_RAT	97	105175	2.178	4.163	4	Alpha-actinin-1 OS=Rattus norvegicus GN=Actn1 PE=1 SV=1
62		RS2_RAT	40	32271	2.129	3.326	2	40S ribosomal protein S2 OS=Rattus norvegicus GN=Rps2 PE=1 SV=1
25		PTBP1_RAT	105	60474	1.887	5.357	6	Polypyrimidine tract-binding protein 1 OS=Rattus norvegicus GN=Ptbp1 PE=1 SV=1
9		ATPA_RAT	257	60826	1.853	5.391	10	ATP synthase subunit alpha, mitochondrial OS=Rattus norvegicus GN=Atp5a1 PE=1 SV=2
47		RLA1_RAT	65	11803	1.818	1.047	2	60S acidic ribosomal protein P1 OS=Rattus norvegicus GN=Rplp1 PE=3 SV=1
44		RS5_RAT	70	23519	1.782	6.393	2	40S ribosomal protein S5 OS=Rattus norvegicus GN=Rps5 PE=2 SV=3
2		PDIA1_RAT	577	58751	1.689	1.344	9	Protein disulfide-isomerase OS=Rattus norvegicus GN=P4hb PE=1 SV=2
84		RL4_RAT	26	49402	1.585	1.078	2	60S ribosomal protein L4 OS=Rattus norvegicus GN=Rpl4 PE=1 SV=3
82		FAIM3_RAT	27	48950	1.538	1.161	2	Fas apoptotic inhibitory molecule 3 OS=Rattus norvegicus GN=Faim3 PE=2 SV=1
7		ATPB_RAT	281	57056	1.057	33.16	8	ATP synthase subunit beta, mitochondrial OS=Rattus norvegicus GN=Atp5b PE=1 SV=2
38		HNRPK_RAT	76	51940	1.023	5.246	2	Heterogeneous nuclear ribonucleoprotein K OS=Rattus norvegicus GN=Hnrnpk PE=1 SV=1
36		MYH9_RAT	79	234161	0.861	2.065	4	Myosin-9 OS=Rattus norvegicus GN=Myh9 PE=1 SV=3
11		NONO_RAT	207	55763	0.4983	6.937	6	Non-POU domain-containing octamer-binding protein OS=Rattus norvegicus GN=Nono PE=2 SV=3
83		PUR9_RAT	27	65643	0.2668	1.431	2	Bifunctional purine biosynthesis protein PURH OS=Rattus norvegicus GN=Atic PE=1 SV=2
50		TRY1_RAT	63	26863	0.1897	2.282	2	Anionic trypsin-1 OS=Rattus norvegicus GN=Prss1 PE=1 SV=1
90		ATF3_RAT	22	21554	0.07065	1.684	2	Cyclic AMP-dependent transcription factor ATF-3 OS=Rattus norvegicus GN=Atf3 PE=2 SV=1
15		PPIA_RAT	139	18544				Peptidyl-prolyl cis-trans isomerase A OS=Rattus norvegicus GN=Ppia PE=1 SV=2
17		TERA_RAT	132	91495				Transitional endoplasmic reticulum ATPase OS=Rattus norvegicus GN=Vcp PE=1 SV=3
19		RL6_RAT	126	35001				60S ribosomal protein L6 OS=Rattus norvegicus GN=Rpl6 PE=1 SV=5
20		CAP1_RAT	119	53187				Adenylyl cyclase-associated protein 1 OS=Rattus norvegicus GN=Cap1 PE=1 SV=3
29		UBA1_RAT	89	120417				Ubiquitin-like modifier-activating enzyme 1 OS=Rattus norvegicus GN=Uba1 PE=1 SV=1
30		PARK7_RAT	88	20674				Protein DJ-1 OS=Rattus norvegicus GN=Park7 PE=1 SV=1
31		PTRF_RAT	87	44975				Polymerase I and transcript release factor OS=Rattus norvegicus GN=Ptrf PE=1 SV=1
33		TCPG_RAT	80	62310				T-complex protein 1 subunit gamma OS=Rattus norvegicus GN=Cct3 PE=1 SV=1
34		CATB_RAT	80	38822				Cathepsin B OS=Rattus norvegicus GN=Ctsb PE=1 SV=2
43		ANXA5_RAT	71	36453				Annexin A5 OS=Rattus norvegicus GN=Anxa5 PE=1 SV=3
46		ALDH2_RAT	66	57968				Aldehyde dehydrogenase, mitochondrial OS=Rattus norvegicus GN=Aldh2 PE=1 SV=1
49		AT5F1_RAT	65	29672				ATP synthase subunit b, mitochondrial OS=Rattus norvegicus GN=Atp5f1 PE=1 SV=1
52		TCPB_RAT	62	58988				T-complex protein 1 subunit beta OS=Rattus norvegicus GN=Cct2 PE=1 SV=3
54		G6PI_RAT	58	64275				Glucose-6-phosphate isomerase OS=Rattus norvegicus GN=Gpi PE=1 SV=1
55		RLA2_RAT	58	12005				60S acidic ribosomal protein P2 OS=Rattus norvegicus GN=Rplp2 PE=1 SV=2
56		RLA0_RAT	56	34977				60S acidic ribosomal protein P0 OS=Rattus norvegicus GN=Rplp0 PE=1 SV=2
59		ANXA2_RAT	45	40002				Annexin A2 OS=Rattus norvegicus GN=Anxa2 PE=1 SV=2
61		FPPS_RAT	41	41953				Farnesyl pyrophosphate synthase OS=Rattus norvegicus GN=Fdps PE=2 SV=2
65		CAND1_RAT	37	140515				Cullin-associated NEDD8-dissociated protein 1 OS=Rattus norvegicus GN=Cand1 PE=1 SV=1
70		PGAM1_RAT	34	29507				Phosphoglycerate mutase 1 OS=Rattus norvegicus GN=Pgam1 PE=1 SV=4
73		HCD2_RAT	33	27729				3-hydroxyacyl-CoA dehydrogenase type-2 OS=Rattus norvegicus GN=Hsd17b10 PE=1 SV=3
74		PRDX1_RAT	33	22936				Peroxiredoxin-1 OS=Rattus norvegicus GN=Prdx1 PE=1 SV=1
77		RL18_RAT	30	22344				60S ribosomal protein L18 OS=Rattus norvegicus GN=Rpl18 PE=2 SV=2
80		KLH17_RAT	29	70921				Kelch-like protein 17 OS=Rattus norvegicus GN=Klhl17 PE=1 SV=1
81		CALR_RAT	29	49486				Calreticulin OS=Rattus norvegicus GN=Calr PE=1 SV=1
85		PDIA3_RAT	26	58655				Protein disulfide-isomerase A3 OS=Rattus norvegicus GN=Pdia3 PE=1 SV=2
88		CLH_RAT	25	196326				Clathrin heavy chain 1 OS=Rattus norvegicus GN=Cltc PE=1 SV=3

## Sheet: mix3Rat
Hit	Member	Accession	Score	Mass	H/L	SD(geo)	#	Description
49		LEG1_RAT	46	15484	13.97	2.236	2	Galectin-1 OS=Rattus norvegicus GN=Lgals1 PE=1 SV=2
21		ALDH2_RAT	93	57968	13.1	3.939	2	Aldehyde dehydrogenase, mitochondrial OS=Rattus norvegicus GN=Aldh2 PE=1 SV=1
42		ARP3_RAT	55	48528	9.469	3.07	2	Actin-related protein 3 OS=Rattus norvegicus GN=Actr3 PE=1 SV=1
67		RS10_RAT	30	19321	7.625	5.238	2	40S ribosomal protein S10 OS=Rattus norvegicus GN=Rps10 PE=2 SV=1
65		PRDX1_RAT	31	22936	7.603	1.342	3	Peroxiredoxin-1 OS=Rattus norvegicus GN=Prdx1 PE=1 SV=1
78		RPN2_RAT	24	70113	7.263	1.326	2	Dolichyl-diphosphooligosaccharide--protein glycosyltransferase subunit 2 OS=Rattus norvegicus GN=Rpn2 PE=2 SV=2
22		MDHM_RAT	90	36926	5.966	1.787	3	Malate dehydrogenase, mitochondrial OS=Rattus norvegicus GN=Mdh2 PE=1 SV=2
69		S10A6_RAT	30	10407	5.778	1.04	2	Protein S100-A6 OS=Rattus norvegicus GN=S100a6 PE=1 SV=3
39		HSP7C_RAT	59	72790	5.746	1.572	2	Heat shock cognate 71 kDa protein OS=Rattus norvegicus GN=Hspa8 PE=1 SV=1
79		PGK1_RAT	24	46230	5.574	1.035	2	Phosphoglycerate kinase 1 OS=Rattus norvegicus GN=Pgk1 PE=1 SV=2
6		LDHA_RAT	418	37615	5.535	2.1	6	L-lactate dehydrogenase A chain OS=Rattus norvegicus GN=Ldha PE=1 SV=1
70		1433G_RAT	29	29004	5.47	1.571	2	14-3-3 protein gamma OS=Rattus norvegicus GN=Ywhag PE=1 SV=2
5		ANXA1_RAT	425	40147	4.795	1.358	8	Annexin A1 OS=Rattus norvegicus GN=Anxa1 PE=1 SV=2
25		EF1A1_RAT	85	51748	4.638	1.249	6	Elongation factor 1-alpha 1 OS=Rattus norvegicus GN=Eef1a1 PE=1 SV=1
15		TKT_RAT	123	69797	4.49	4.184	4	Transketolase OS=Rattus norvegicus GN=Tkt PE=1 SV=1
11		VINC_RAT	186	119527	4.43	1.11	2	Vinculin OS=Rattus norvegicus GN=Vcl PE=1 SV=1
30		ACLY_RAT	84	123859	4.309	2.506	3	ATP-citrate synthase OS=Rattus norvegicus GN=Acly PE=1 SV=1
1		TBA1B_RAT	607	51425	4.283	2.18	7	Tubulin alpha-1B chain OS=Rattus norvegicus GN=Tuba1b PE=1 SV=1
4		ENOA_RAT	435	48600	4.136	1.652	17	Alpha-enolase OS=Rattus norvegicus GN=Eno1 PE=1 SV=4
60		THIC_RAT	35	42219	3.926	2.267	3	Acetyl-CoA acetyltransferase, cytosolic OS=Rattus norvegicus GN=Acat2 PE=1 SV=1
41		CH60_RAT	55	62822	3.919	3.073	2	60 kDa heat shock protein, mitochondrial OS=Rattus norvegicus GN=Hspd1 PE=1 SV=1
72		PLAK_RAT	29	83400	3.903	1.506	2	Junction plakoglobin OS=Rattus norvegicus GN=Jup PE=1 SV=1
10		ACTB_RAT	200	42667	3.809	1.414	7	Actin, cytoplasmic 1 OS=Rattus norvegicus GN=Actb PE=1 SV=1
13		PSD13_RAT	128	43818	3.526	3.83	5	26S proteasome non-ATPase regulatory subunit 13 OS=Rattus norvegicus GN=Psmd13 PE=1 SV=1
61		RS2_RAT	33	32271	3.489	3.608	2	40S ribosomal protein S2 OS=Rattus norvegicus GN=Rps2 PE=1 SV=1
23		HS90B_RAT	88	85981	3.476	1.462	5	Heat shock protein HSP 90-beta OS=Rattus norvegicus GN=Hsp90ab1 PE=1 SV=4
3		SERPH_RAT	536	47726	3.126	1.48	10	Serpin H1 OS=Rattus norvegicus GN=Serpinh1 PE=1 SV=1
18		KPYM_RAT	103	59457	2.987	2.239	6	Pyruvate kinase isozymes M1/M2 OS=Rattus norvegicus GN=Pkm2 PE=1 SV=3
48		ANXA2_RAT	46	40002	2.913	10.76	2	Annexin A2 OS=Rattus norvegicus GN=Anxa2 PE=1 SV=2
68		FPPS_RAT	30	41953	2.774	2.487	4	Farnesyl pyrophosphate synthase OS=Rattus norvegicus GN=Fdps PE=2 SV=2
77		RS23_RAT	25	16613	2.603	1.196	2	40S ribosomal protein S23 OS=Rattus norvegicus GN=Rps23 PE=2 SV=3
34		PTBP1_RAT	73	60606	2.596	11.73	2	Polypyrimidine tract-binding protein 1 OS=Rattus norvegicus GN=Ptbp1 PE=1 SV=1
33		MYH9_RAT	74	234161	2.544	3.002	5	Myosin-9 OS=Rattus norvegicus GN=Myh9 PE=1 SV=3
7		PDIA6_RAT	231	49607	2.391	1.283	5	Protein disulfide-isomerase A6 OS=Rattus norvegicus GN=Pdia6 PE=1 SV=2
36		PDIA3_RAT	64	58655	2.39	1.751	2	Protein disulfide-isomerase A3 OS=Rattus norvegicus GN=Pdia3 PE=1 SV=2
29		PROF1_RAT	84	15410	2.226	2.388	4	Profilin-1 OS=Rattus norvegicus GN=Pfn1 PE=1 SV=2
12		ATPB_RAT	184	57056	2.139	5.197	5	ATP synthase subunit beta, mitochondrial OS=Rattus norvegicus GN=Atp5b PE=1 SV=2
16		GRP78_RAT	109	74432	2.079	1.541	4	78 kDa glucose-regulated protein OS=Rattus norvegicus GN=Hspa5 PE=1 SV=1
35		MBB1A_RAT	70	155920	2.029	1.219	2	Myb-binding protein 1A OS=Rattus norvegicus GN=Mybbp1a PE=2 SV=2
52		OST48_RAT	44	49706	1.867	2.327	2	Dolichyl-diphosphooligosaccharide--protein glycosyltransferase 48 kDa subunit OS=Rattus norvegicus GN=Ddost PE=2 SV=1
2		PDIA1_RAT	568	58751	1.776	1.518	9	Protein disulfide-isomerase OS=Rattus norvegicus GN=P4hb PE=1 SV=2
71		RS16_RAT	29	17000	1.697	1.119	2	40S ribosomal protein S16 OS=Rattus norvegicus GN=Rps16 PE=1 SV=2
24		ANXA5_RAT	86	36453	1.524	1.747	2	Annexin A5 OS=Rattus norvegicus GN=Anxa5 PE=1 SV=3
26		RL6_RAT	85	35202	1.508	1.628	2	60S ribosomal protein L6 OS=Rattus norvegicus GN=Rpl6 PE=1 SV=5
8		ATPA_RAT	214	60826	1.496	7.381	9	ATP synthase subunit alpha, mitochondrial OS=Rattus norvegicus GN=Atp5a1 PE=1 SV=2
55		DHSA_RAT	40	73511	1.466	2.086	2	Succinate dehydrogenase [ubiquinone] flavoprotein subunit, mitochondrial OS=Rattus norvegicus GN=Sdha PE=1 SV=1
43		IMB1_RAT	52	99742	1.397	2.641	2	Importin subunit beta-1 OS=Rattus norvegicus GN=Kpnb1 PE=1 SV=1
9		NONO_RAT	205	55763	1.185	3.861	6	Non-POU domain-containing octamer-binding protein OS=Rattus norvegicus GN=Nono PE=2 SV=3
45		HNRPK_RAT	51	51940	1.1	3.211	2	Heterogeneous nuclear ribonucleoprotein K OS=Rattus norvegicus GN=Hnrnpk PE=1 SV=1
59		RLA0_RAT	36	34977	1.09	1.482	2	60S acidic ribosomal protein P0 OS=Rattus norvegicus GN=Rplp0 PE=1 SV=2
76		SET_RAT	25	34030	1.088	1.749	2	Protein SET OS=Rattus norvegicus GN=Set PE=1 SV=2
32		EF2_RAT	74	98003	0.8617	3.522	5	Elongation factor 2 OS=Rattus norvegicus GN=Eef2 PE=1 SV=4
44		ANXA3_RAT	51	37301	0.5964	2.872	2	Annexin A3 OS=Rattus norvegicus GN=Anxa3 PE=1 SV=4
27		ACTN1_RAT	85	105175	0.5268	15.01	2	Alpha-actinin-1 OS=Rattus norvegicus GN=Actn1 PE=1 SV=1
14		PPIA_RAT	125	18544				Peptidyl-prolyl cis-trans isomerase A OS=Rattus norvegicus GN=Ppia PE=1 SV=2
17		MIF_RAT	104	12739				Macrophage migration inhibitory factor OS=Rattus norvegicus GN=Mif PE=1 SV=4
19		TBB5_RAT	102	50523				Tubulin beta-5 chain OS=Rattus norvegicus GN=Tubb5 PE=1 SV=1
20		PTRF_RAT	95	44975				Polymerase I and transcript release factor OS=Rattus norvegicus GN=Ptrf PE=1 SV=1
28		TERA_RAT	84	91495				Transitional endoplasmic reticulum ATPase OS=Rattus norvegicus GN=Vcp PE=1 SV=3
31		CAP1_RAT	80	53187				Adenylyl cyclase-associated protein 1 OS=Rattus norvegicus GN=Cap1 PE=1 SV=3
37		RL18_RAT	63	22264				60S ribosomal protein L18 OS=Rattus norvegicus GN=Rpl18 PE=2 SV=2
38		RLA1_RAT	60	11803				60S acidic ribosomal protein P1 OS=Rattus norvegicus GN=Rplp1 PE=3 SV=1
40		FAS_RAT	58	278416				Fatty acid synthase OS=Rattus norvegicus GN=Fasn PE=1 SV=3
46		ENPL_RAT	47	95376				Endoplasmin OS=Rattus norvegicus GN=Hsp90b1 PE=1 SV=2
47		PGAM1_RAT	46	29434				Phosphoglycerate mutase 1 OS=Rattus norvegicus GN=Pgam1 PE=1 SV=4
50		UBA1_RAT	45	120417				Ubiquitin-like modifier-activating enzyme 1 OS=Rattus norvegicus GN=Uba1 PE=1 SV=1
51		ALDR_RAT	45	37040				Aldose reductase OS=Rattus norvegicus GN=Akr1b1 PE=1 SV=3
53		G6PI_RAT	43	64275				Glucose-6-phosphate isomerase OS=Rattus norvegicus GN=Gpi PE=1 SV=1
54		GDIA_RAT	41	52014				Rab GDP dissociation inhibitor alpha OS=Rattus norvegicus GN=Gdi1 PE=1 SV=1
56		AT5F1_RAT	39	29672				ATP synthase subunit b, mitochondrial OS=Rattus norvegicus GN=Atp5f1 PE=1 SV=1
57		TBB5_RAT	37	33272				40S ribosomal protein SA OS=Rattus norvegicus GN=Rpsa PE=1 SV=3
58		TCPD_RAT	36	59835				T-complex protein 1 subunit delta OS=Rattus norvegicus GN=Cct4 PE=1 SV=3
62		EZRI_RAT	32	71227				Ezrin OS=Rattus norvegicus GN=Ezr PE=1 SV=3
63		CLIC1_RAT	31	27857				Chloride intracellular channel protein 1 OS=Rattus norvegicus GN=Clic1 PE=1 SV=1
64		G3P_RAT	31	36929				Glyceraldehyde-3-phosphate dehydrogenase OS=Rattus norvegicus GN=Gapdh PE=1 SV=3
66		ARPC5_RAT	30	16817				Actin-related protein 2/3 complex subunit 5 OS=Rattus norvegicus GN=Arpc5 PE=1 SV=3
73		KLH17_RAT	27	70921				Kelch-like protein 17 OS=Rattus norvegicus GN=Klhl17 PE=1 SV=1
74		LMNA_RAT	27	75851				Prelamin-A/C OS=Rattus norvegicus GN=Lmna PE=1 SV=1
75		ADT1_RAT	26	33970				ADP/ATP translocase 1 OS=Rattus norvegicus GN=Slc25a4 PE=1 SV=3
80		VIME_RAT	20	54375				Vimentin OS=Rattus norvegicus GN=Vim PE=1 SV=2

## Sheet: statistics
Accession	Score	H/L(Ⅰ)	H/L(Ⅱ)	H/L(Ⅲ)	#	Average	Std	Description
ATPA_RAT	156	17.9	1.853	1.496	3			ATP synthase subunit alpha, mitochondrial OS=Rattus norvegicus GN=Atp5a1 PE=1 SV=2
HS90B_RAT	86	13.28	2.878	3.476	3			Heat shock protein HSP 90-beta OS=Rattus norvegicus GN=Hsp90ab1 PE=1 SV=4
TBB5_RAT	130	12.79	4.25	NA	2			Tubulin beta-5 chain OS=Rattus norvegicus GN=Tubb5 PE=1 SV=1
G3P_RAT	81	11.99	5.808	NA	3			Glyceraldehyde-3-phosphate dehydrogenase OS=Rattus norvegicus GN=Gapdh PE=1 SV=3
EF1A1_RAT	166	10.02	4.112	4.638	13	6.25667	3.26974	Elongation factor 1-alpha 1 OS=Rattus norvegicus GN=Eef1a1 PE=1 SV=1
VINC_RAT	116	9.82	4.983	4.43	2	6.411	2.9652	Vinculin OS=Rattus norvegicus GN=Vcl PE=1 SV=1
PROF1_RAT	104	7.462	4.006	2.226	3			Profilin-1 OS=Rattus norvegicus GN=Pfn1 PE=1 SV=2
ANXA1_RAT	389	7.34	3.588	4.795	7	5.241	1.91535	Annexin A1 OS=Rattus norvegicus GN=Anxa1 PE=1 SV=2
PDIA6_RAT	246	7.179	3.655	2.391	5	4.40833	2.4813	Protein disulfide-isomerase A6 OS=Rattus norvegicus GN=Pdia6 PE=1 SV=2
NONO_RAT	95	6.66	0.4983	1.185	2			Non-POU domain-containing octamer-binding protein OS=Rattus norvegicus GN=Nono PE=2 SV=3
TBA1B_RAT	495	6.067	3.49	4.283	11	4.61333	1.31988	Tubulin alpha-1B chain OS=Rattus norvegicus GN=Tuba1b PE=1 SV=1
SERPH_RAT	565	5.637	3.649	3.126	12	4.13733	1.32481	Serpin H1 OS=Rattus norvegicus GN=Serpinh1 PE=1 SV=1
ENOA_RAT	369	5.431	2.863	4.136	13	4.14333	1.28402	Alpha-enolase OS=Rattus norvegicus GN=Eno1 PE=1 SV=4
MDHM_RAT	97	5.25	5.916	5.966	3	5.71067	0.399732	Malate dehydrogenase, mitochondrial OS=Rattus norvegicus GN=Mdh2 PE=1 SV=2
LDHA_RAT	90	5.119	3.341	5.535	3	4.665	1.16533	L-lactate dehydrogenase A chain OS=Rattus norvegicus GN=Ldha PE=1 SV=1
HSP7C_RAT	106	5.059	3.495	5.746	4	4.76667	1.15362	Heat shock cognate 71 kDa protein OS=Rattus norvegicus GN=Hspa8 PE=1 SV=1
PDIA1_RAT	482	4.98	1.689	1.776	5			Protein disulfide-isomerase OS=Rattus norvegicus GN=P4hb PE=1 SV=2
KPYM_RAT	102	4.936	8.503	2.987	4	5.47533	2.79727	Pyruvate kinase isozymes M1/M2 OS=Rattus norvegicus GN=Pkm2 PE=1 SV=3
GRP78_RAT	129	4.85	2.869	2.079	5	3.266	1.42752	78 kDa glucose-regulated protein OS=Rattus norvegicus GN=Hspa5 PE=1 SV=1
ENPL_RAT	178	4.741	3.575	NA	4			Endoplasmin OS=Rattus norvegicus GN=Hsp90b1 PE=1 SV=2
PSD13_RAT	127	3.585	6.874(68)	3.526(128)	5			26S proteasome non-ATPase regulatory subunit 13 OS=Rattus norvegicus GN=Psmd13 PE=1 SV=1
ATPB_RAT	215	3.223	1.057	2.139	6			ATP synthase subunit beta, mitochondrial OS=Rattus norvegicus GN=Atp5b PE=1 SV=2
GDIB_RAT	89	3.153	4.092(133)	??	3			Rab GDP dissociation inhibitor beta OS=Rattus norvegicus GN=Gdi2 PE=1 SV=2
PTBP1_RAT	158	1.508	1.887(105)	2.596(73)	4			Polypyrimidine tract-binding protein 1 OS=Rattus norvegicus GN=Ptbp1 PE=1 SV=1
ANXA5_RAT	83	1.352	NA	1.524(86)	2			Annexin A5 OS=Rattus norvegicus GN=Anxa5 PE=1 SV=3
HNRPK_RAT	83	0.9539	1.023(76)	1.1(51)	2			Heterogeneous nuclear ribonucleoprotein K OS=Rattus norvegicus GN=Hnrnpk PE=1 SV=1
